# Supplementary material for: Genotypic Diversity Is Independent of Pathogenicity in Colombian Strains of Cryptococcus neoformans and Cryptococcus gattii in Galleria mellonella
Source: PubMed Central journal article supplement (PMC6162678; doi:10.3390/jof4030082), 2018-07-05
Supplement: jof-04-00082-s001.pdf [file jof-04-00082-s001.pdf]

**Table S1.** General information of *Cryptococcus neoformans* and *C. gattii* clinical and environmental isolates according to species complex, sequence types (STs), macroscopic morphology, cellular and capsular size determination pre- and post-inoculation, mating type determination and mean survival time (days) in *G. mellonella*.

| Species complex      | ST            | Strain (H0058-I-) | Macroscopic morphology |        |               | Pre-inoculation |               | Post-inoculation |               | Mating type | Mean survival in <i>G. mellonella</i> (days) |       |
|----------------------|---------------|-------------------|------------------------|--------|---------------|-----------------|---------------|------------------|---------------|-------------|----------------------------------------------|-------|
|                      |               |                   | Texture                | Aspect | Diameter (mm) | Cellular (µm)   | Capsular (µm) | Cellular (µm)    | Capsular (µm) |             |                                              |       |
| <i>C. neoformans</i> | Clinical      |                   |                        |        |               |                 |               |                  |               |             |                                              |       |
|                      |               |                   |                        |        |               |                 |               |                  |               |             | Suppl. Fig 1a                                |       |
|                      | 2             | 3746              | Mucoïd                 |        | 3.70          | 7.53            | 0.21          | 4.49             | 0.52          | α           | 5.60                                         |       |
|                      | 2             | 3852              |                        |        | 4.10          | 5.34            | 0.48          | 6.98             | 1.60          |             | 6.00                                         |       |
|                      | 5             | 2881              |                        |        | 3.10          | 5.57            | 0.52          | 4.58             | 1.76          |             | 2.80                                         |       |
|                      | 6             | 3463              |                        |        | 3.20          | 5.68            | 0.50          | 4.05             | 2.88          |             | 4.90                                         |       |
|                      | 25            | 3104              |                        |        | 6.90          | 5.49            | 0.75          | 6.14             | 0.49          |             | 3.90                                         |       |
|                      | 32            | 2340              | Non-mucoïd             | Smooth | 3.60          | 5.87            | 0.48          | 5.42             | 0.56          |             | 4.00                                         |       |
|                      | 40            | 3589              | Mucoïd                 |        | 3.20          | 6.20            | 0.48          | 4.40             | 1.63          |             | 9.90                                         |       |
|                      | 63            | 2503              |                        |        | 5.60          | 5.75            | 0.52          | 4.48             | 0.87          |             | 9.20                                         |       |
|                      | 69            | 3099              |                        |        | 3.90          | 5.87            | 0.45          | 5.96             | 1.81          |             | 6.40                                         |       |
|                      | 71            | 3489              |                        |        | 3.00          | 3.30            | 0.34          | 5.22             | 1.60          |             | 3.90                                         |       |
|                      | 77            | 708               |                        |        | 6.30          | 6.71            | 1.14          | 6.40             | 1.03          |             | 4.60                                         |       |
|                      | 77            | 3845              |                        |        | 4.40          | 5.72            | 0.67          | 4.35             | 1.60          |             | 9.70                                         |       |
|                      | 93            | 995               |                        |        | 6.00          | 5.54            | 0.59          | 9.18             | 3.08          |             | 5.60                                         |       |
|                      | 93            | 1226              |                        |        | 5.40          | 5.99            | 0.57          | 6.39             | 0.86          |             | 3.60                                         |       |
|                      | 93            | 2073              |                        |        | 4.40          | 4.73            | 1.22          | 7.98             | 1.02          |             | 3.90                                         |       |
|                      | 93            | 2356              |                        |        | Non-mucoïd    | Rugose          | 3.64          | 6.09             | 0.55          |             | 6.84                                         | 1.10  |
|                      | 93            | 2624              | 4.37                   |        |               |                 | 6.53          | 0.45             | 11.88         |             | 1.61                                         | 5.90  |
|                      | 93            | 3189              | Mucoïd                 |        | Smooth        | 4.07            | 6.72          | 0.59             | 11.51         |             | 1.25                                         | 5.80  |
|                      | 93            | 3938              |                        |        |               | 3.79            | 6.15          | 0.48             | 4.40          |             | 0.9                                          | 10.80 |
|                      | 199           | 714               |                        |        |               | 5.10            | 5.9           | 0.93             | 9.78          |             | 3.42                                         | 5.70  |
|                      | 307           | 707               |                        | 4.90   |               | 5.85            | 0.92          | 7.97             | 2.55          |             | 4.10                                         |       |
|                      | 307           | 727               |                        | 4.30   |               | 5.44            | 0.83          | 8.00             | 1.32          |             | 6.20                                         |       |
|                      | 307           | 2087              |                        | 4.20   |               | 6.19            | 0.85          | 10.33            | 3.24          |             | 5.00                                         |       |
|                      | 307           | 2274              |                        | 5.90   |               | 6.12            | 0.89          | 9.16             | 2.25          |             | 4.00                                         |       |
|                      | Environmental |                   |                        |        |               |                 |               |                  |               |             |                                              |       |
|                      |               |                   |                        |        |               |                 |               |                  |               |             | Suppl. Fig 2a                                |       |
|                      | 15            | 4419              | Mucoïd                 | Smooth | 3.10          | 5.69            | 0.65          | 6.04             | 1.12          |             | α                                            | 7.80  |
|                      | 23            | 4706              |                        |        | 3.40          | 4.29            | 0.25          | 6.80             | 1.34          |             |                                              | 7.10  |
| 56                   | 4630          | 4.70              |                        |        | 5.33          | 0.36            | 4.85          | 2.56             | 10.80         |             |                                              |       |

|                  |                      |      |            |        |      |      |      |      |      |      |               |
|------------------|----------------------|------|------------|--------|------|------|------|------|------|------|---------------|
|                  | 77                   | 4013 |            |        | 3.40 | 5.74 | 0.67 | 4.37 | 2.05 |      | 9.05          |
|                  | 93                   | 3877 |            |        | 4.10 | 6.12 | 0.50 | 4.23 | 0.91 |      | 6.35          |
|                  | 93                   | 4711 |            |        | 4.40 | 6.39 | 0.59 | 4.35 | 0.91 |      | 4.75          |
|                  | 226                  | 5353 |            |        | 3.20 | 1.70 | 0.29 | 4.35 | 0.91 |      | 6.15          |
| <i>C. gattii</i> | <b>Clinical</b>      |      |            |        |      |      |      |      |      |      |               |
|                  |                      |      |            |        |      |      |      |      |      |      | Suppl. Fig 1b |
|                  | 25                   | 212  | Non-mucoid | Smooth | 4.50 | 4.49 | 0.68 | 11.1 | 2.25 | a    | 8.00          |
|                  | 25                   | 2877 | Mucoid     |        | 3.90 | 5.74 | 0.46 | 5.50 | 1.20 |      | 6.00          |
|                  | 47                   | 255  |            |        | 5.40 | 5.40 | 2.88 | 9.40 | 1.85 | α    | 4.20          |
|                  | 51                   | 3286 |            |        | 4.10 | 5.64 | 0.33 | 4.30 | 2.10 |      | 7.90          |
|                  | 58                   | 3031 |            |        | 4.40 | 4.98 | 0.47 | 6.10 | 1.10 |      | 5.00          |
|                  | 85                   | 792  |            |        | 3.60 | 3.57 | 0.66 | 8.90 | 2.21 |      | 8.00          |
|                  | 106                  | 1510 |            |        | 6.90 | 6.93 | 2.76 | 7.60 | 0.90 | 4.30 |               |
|                  | 323                  | 3146 |            |        | 4.80 | 6.45 | 0.83 | 6.70 | 6.10 | a    | 9.40          |
|                  | 324                  | 3407 |            |        | 3.50 | 4.40 | 1.39 | 4.30 | 1.40 | α    | 7.90          |
|                  | <b>Environmental</b> |      |            |        |      |      |      |      |      |      |               |
|                  |                      |      |            |        |      |      |      |      |      |      | Suppl. Fig 2b |
|                  | 25                   | 3526 | Mucoid     | Smooth | 3.80 | 3.08 | 0.25 | 5.70 | 1.20 | a    | 8.00          |
|                  | 75                   | 3593 |            |        | 2.30 | 2.45 | 0.65 | 5.20 | 1.90 |      | 5.40          |
|                  | 79                   | 3080 |            |        | 3.80 | 1.89 | 0.25 | 4.30 | 1.60 | α    | 10.60         |
| 79               | 3874                 | 3.20 |            |        | 3.09 | 0.29 | 4.30 | 1.50 | 9.60 |      |               |
| 79               | 4064                 | 3.90 |            |        | 1.86 | 0.29 | 4.30 | 1.60 | 8.70 |      |               |

**Table S2.** Control strains of *Cryptococcus neoformans* and *C. gattii* used in the study of virulence in the invertebrate model of *Galleria mellonella* and in phenotypic assays.

| Collection ID         | Species                                     | Assay involved             | Characteristics (Reference)                 |                                            |
|-----------------------|---------------------------------------------|----------------------------|---------------------------------------------|--------------------------------------------|
| JEC20                 | <i>C. neoformans</i> var. <i>neoformans</i> | In vivo study              | Low virulence in <i>G. mellonella</i> (10)  |                                            |
| JEC21                 |                                             | Mating type                | Mating type <b>a</b> (17)                   |                                            |
| H99                   | <i>C. neoformans</i> var. <i>grubii</i>     | Mating type                | Mating type $\alpha$ (17)                   |                                            |
| H0058-I-580           |                                             | In vivo study              | High virulence in <i>G. mellonella</i> (10) |                                            |
| H0058-I-755           |                                             |                            | Cellular and capsular size                  | Capsular size 0.59-0.85 $\mu\text{m}$ (15) |
| H0058-I-737           |                                             |                            | Cellular and capsular size                  | Capsular size 0.44-0.6 $\mu\text{m}$ (15)  |
| H0058-I-1580          |                                             | Colony morphology          | Cellular and capsular size                  | Capsular size 0.33-0.85 $\mu\text{m}$ (15) |
| H0058-I-1580          |                                             |                            | Colony morphology                           | Non-mucoid, rough border (15)              |
|                       |                                             |                            | Colony morphology                           | Non-mucoid, smooth (15)                    |
| H0058-I-1320 /B-3506  | <i>C. gattii</i>                            | Cellular and capsular size | Capsular size 0.75-0.95 $\mu\text{m}$ (15)  |                                            |
| H0058-I-2508 /CDC2272 |                                             | Colony morphology          | Mucoid, smooth (15)                         |                                            |
|                       |                                             | In vivo study              | High virulence in <i>G. mellonella</i>      |                                            |

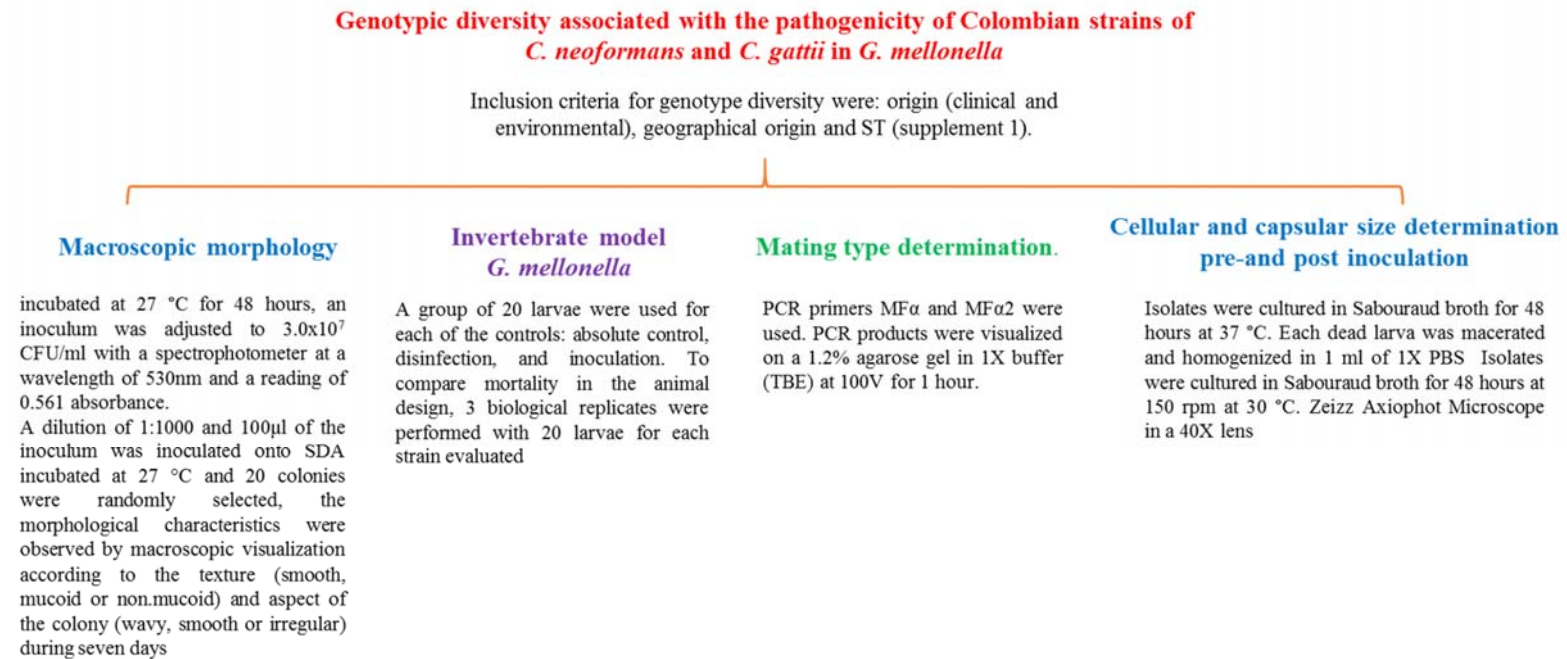

**Figure S1.** Flowchart of the methodology used. Inclusion criteria, macroscopic morphology, mating type determination, invertebrate model in *Galleria mellonella* and cellular and capsular size determination pre- and post-inoculation.

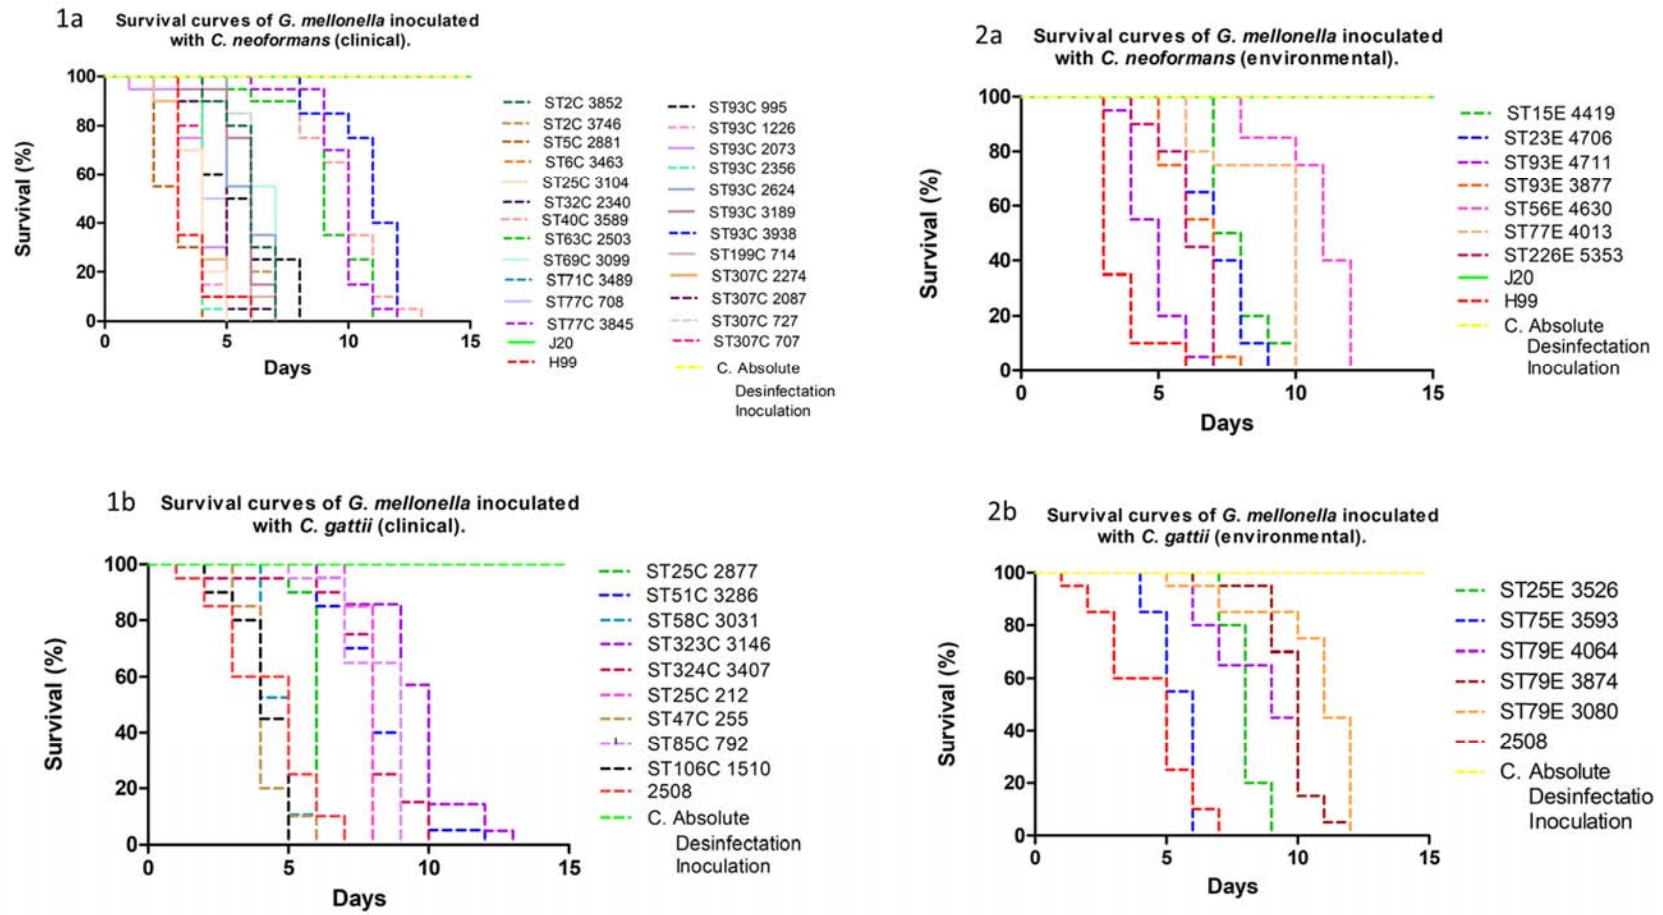

**Figure S2.** Survival curves of *G. mellonella* inoculated with *C. neoformans* (1a clinical isolates -2a environmental isolates). Survival curves of *G. mellonella* inoculated with *C. gattii* (1b clinical isolates, 2b environmental isolates).
